# Supplementary material for: Spectral- and size-resolved mass absorption efficiency of mineral dust aerosols in the shortwave spectrum: a simulation chamber study
Source: Copernicus journal article supplement (doi:10.5194/acp-17-7175-2017), 2017-06-16
Supplement: Supplementary file 1 [file acp-17-7175-2017-supplement.pdf]

Supplement of Atmos. Chem. Phys., 17, 7175–7191, 2017  
<https://doi.org/10.5194/acp-17-7175-2017-supplement>  
© Author(s) 2017. This work is distributed under  
the Creative Commons Attribution 3.0 License.

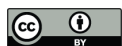

*Supplement of*

**Spectral- and size-resolved mass absorption efficiency  
of mineral dust aerosols in the shortwave spectrum:  
a simulation chamber study**

**Lorenzo Caponi et al.**

*Correspondence to:* Paola Formenti ([paola.formenti@lisa.u-pec.fr](mailto:paola.formenti@lisa.u-pec.fr))

The copyright of individual parts of the supplement might differ from the CC BY 3.0 License.

1 **Figure S1.** Linear deconvolutions of the XANES spectra obtained in this study

2  
3

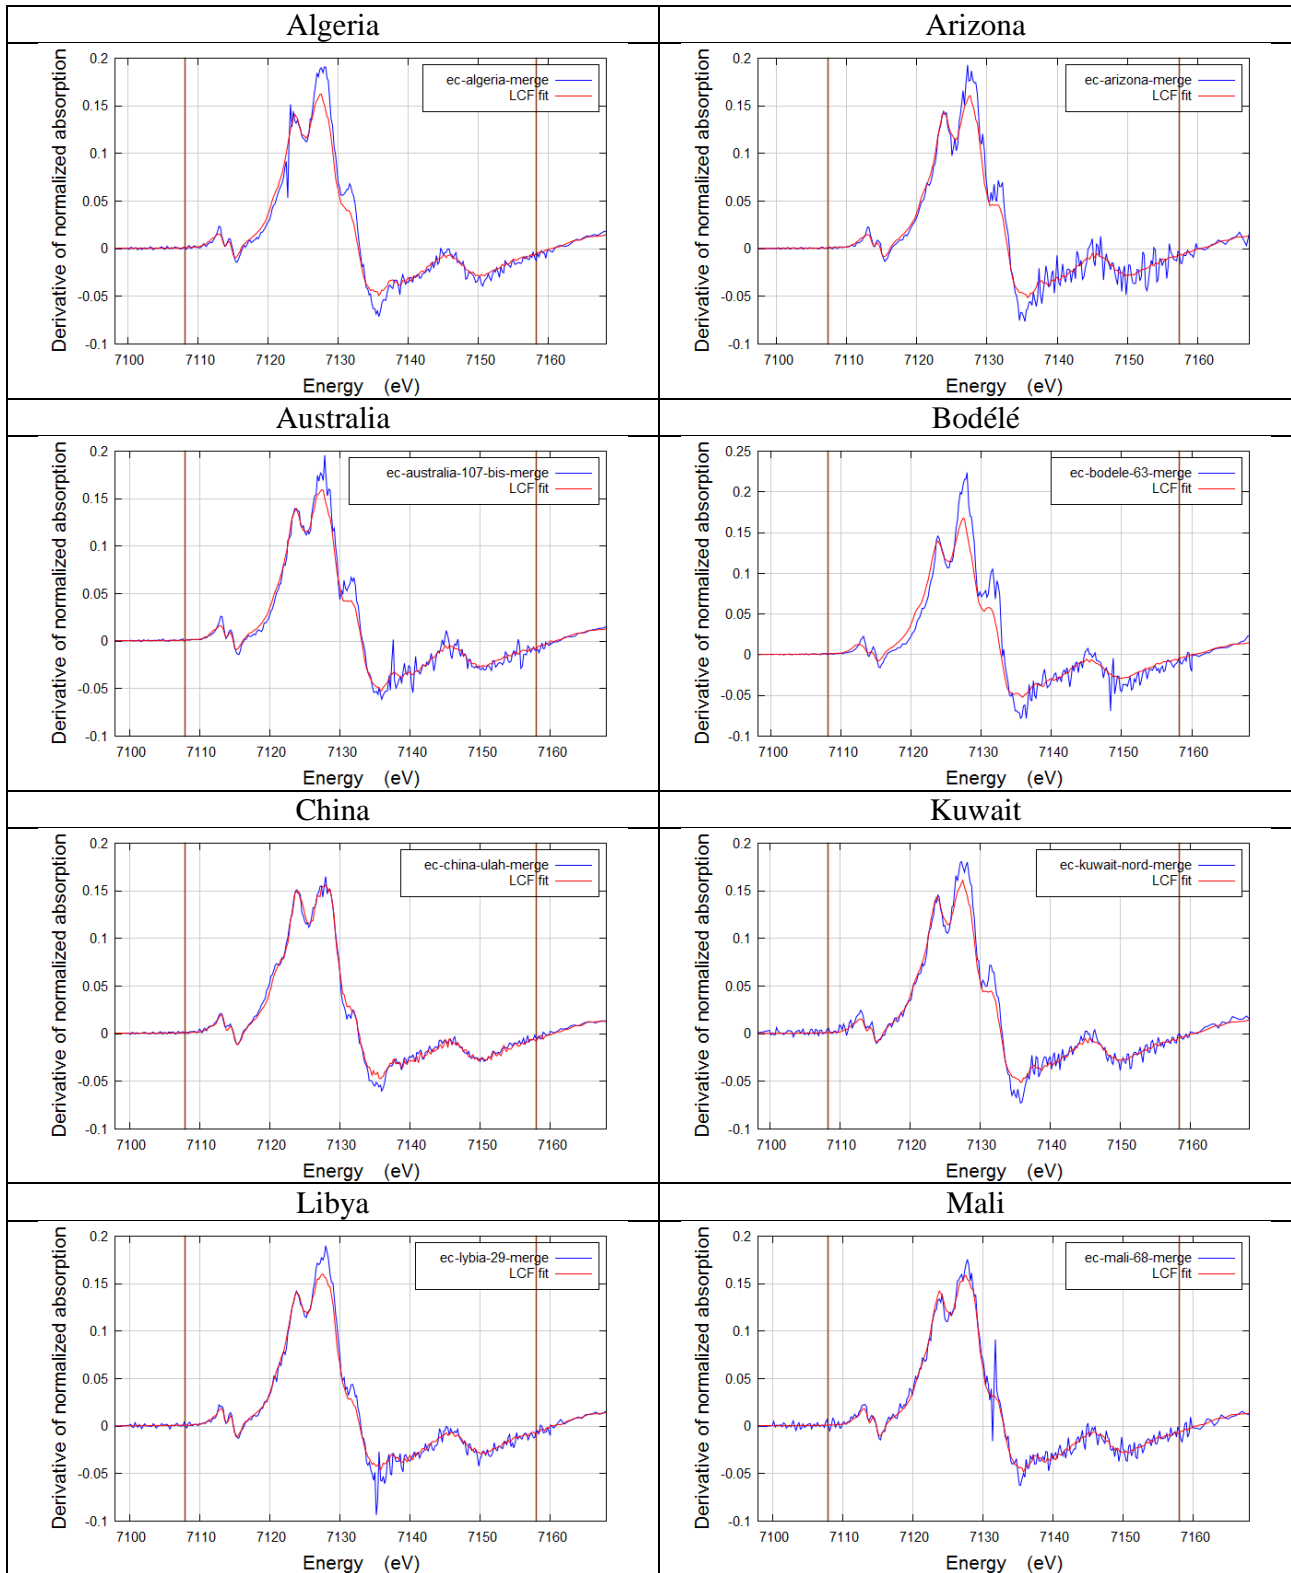

Morocco

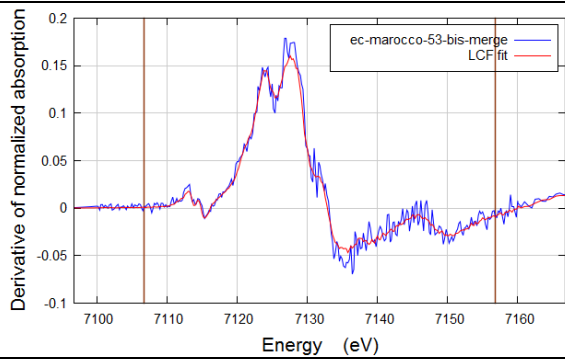

Namibia

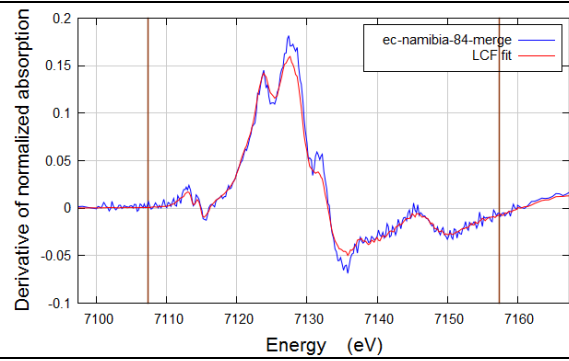

Patagonia

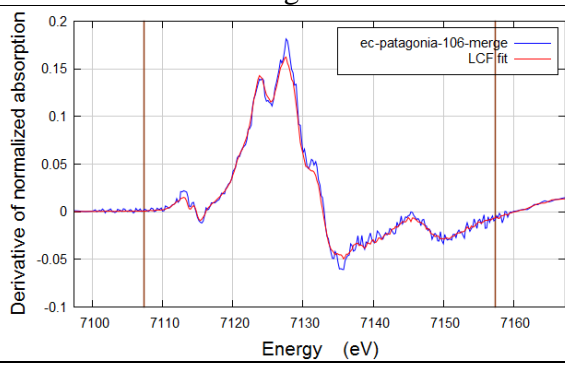

Saudi Arabia

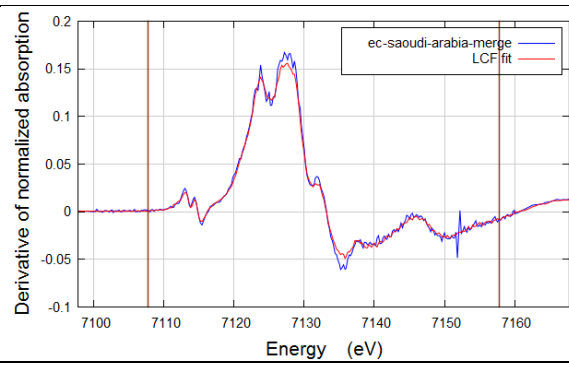

4  
5
